# Supplementary material
Source: publisher figshare collection journal article supplement (https://tandf.figshare.com/articles/dataset/_/6351701)

## Supplementary Information

### First genetic data for band-winged grasshoppers (Orthoptera: Acrididae: Oedipodinae) of the Biskra region of Algeria with new records for the country

Abdelhamid Moussi, Lara-Sophie Dey, Daniel Petit, Abderrahmane Abba, Robert Klessner and Martin Husemann  
African Zoology 2018, 53(1): 31–40. <https://doi.org/10.1080/15627020.2018.1463172>

**Figure S1:** The following figure plates show species distributed in Algeria, which were included in our analyses.

Photos were taken with Canon EOS 5D III and 100mm objective. All pictures were stacked using Program Stacker and following processed using Photoshop CC v. 2017.0.1. Letters in the left upper corner of each photo stand for:

a) *Acrotylus insubricus*, b) *Acrotylus longipennis*, c) *Aiolopus strepens*, d) *Aiolopus thalassinus*, e) *Helioscirtus capsitanus*, f) *Hilethera aepoloides*., g) *Hyalorhipis calcarata*, h) *Leptopternis rothschildi*, i) *Mioscirtus wagneri*, j) *Oedealus senegalensis*, k) *Oedipoda miniata*, l) Spec. nov. 1., m) *Sphingoderus carinatus*, n) *Sphingonotus ebneri*, o) *Sphingonotus finotianus*, p) *Sphingonotus lucasii*, q) *Sphingonotus octofasciatus*, r) *Sphingonotus radioserratus*, s) *Sphingonotus rubescens*, t) *Sphingonotus savignyi*, u) *Sphingonotus tricinctus*, v) *Thalpomena algeriana*, w) *Thalpomena coerulescens*, x) *Vosseleriana fonti*.

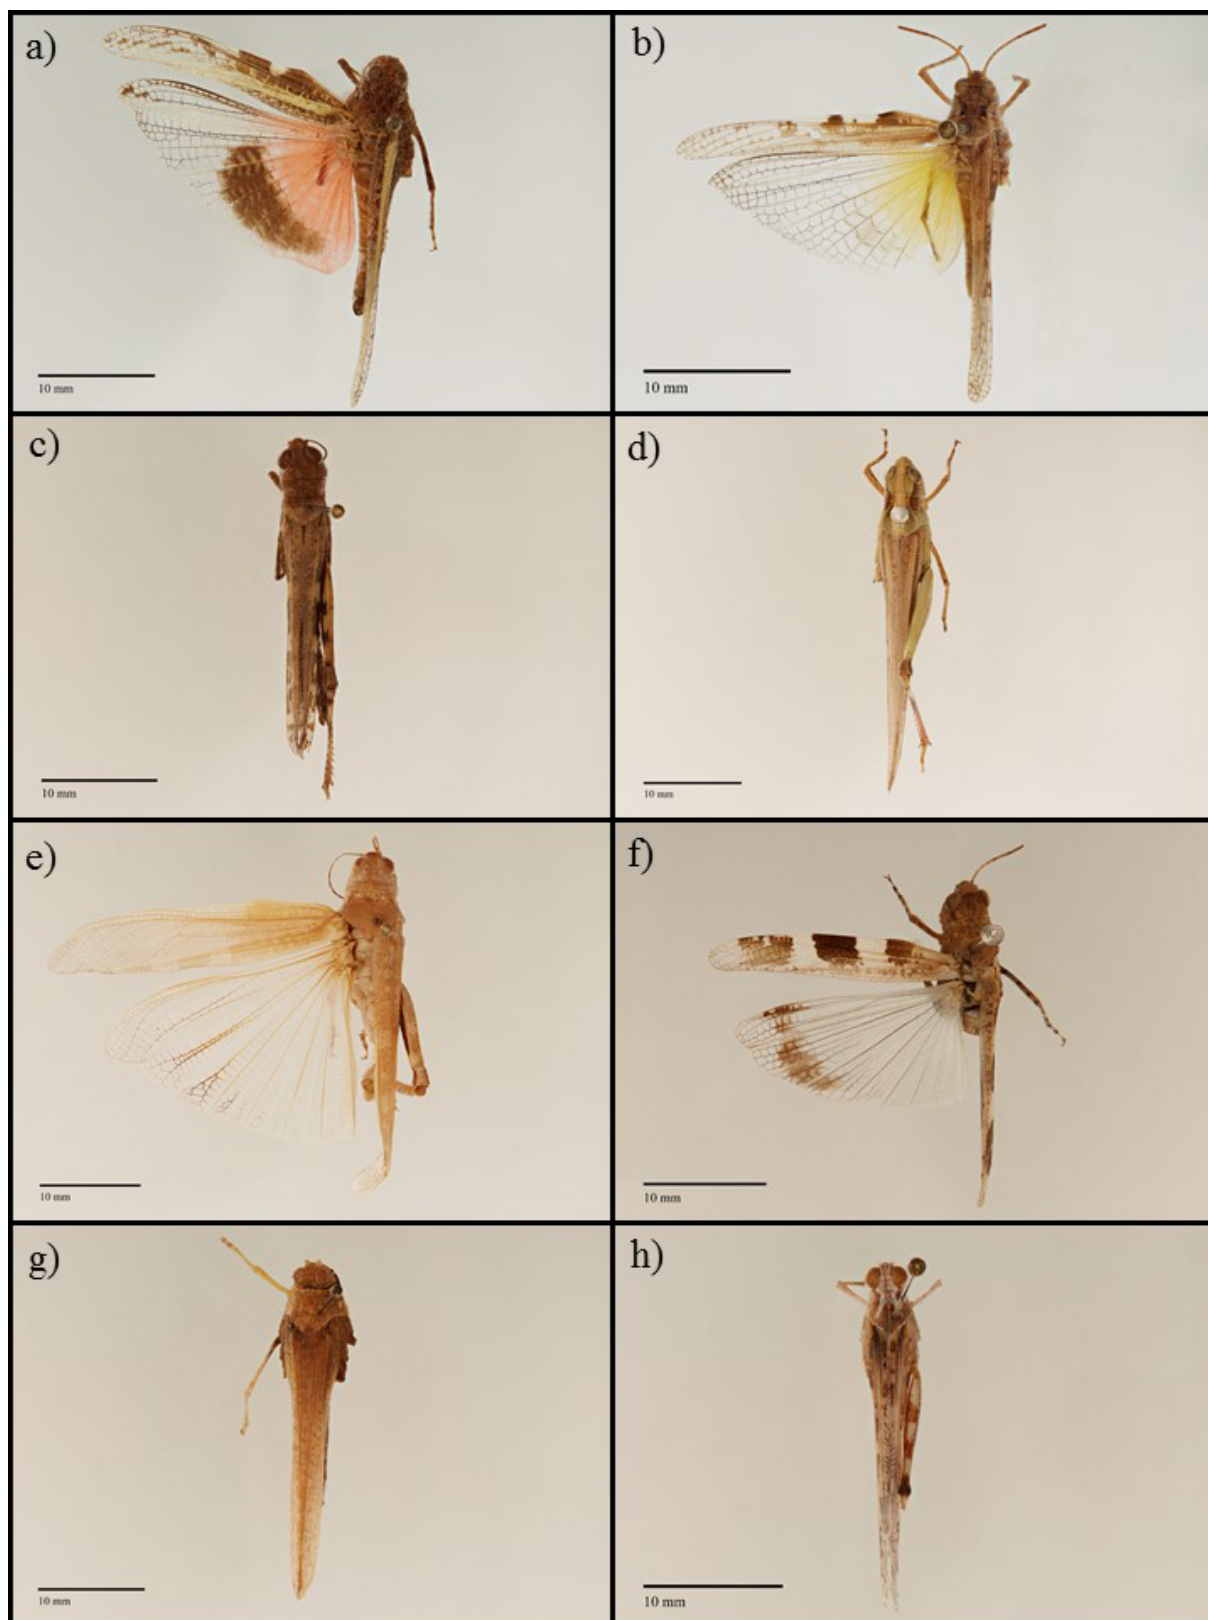

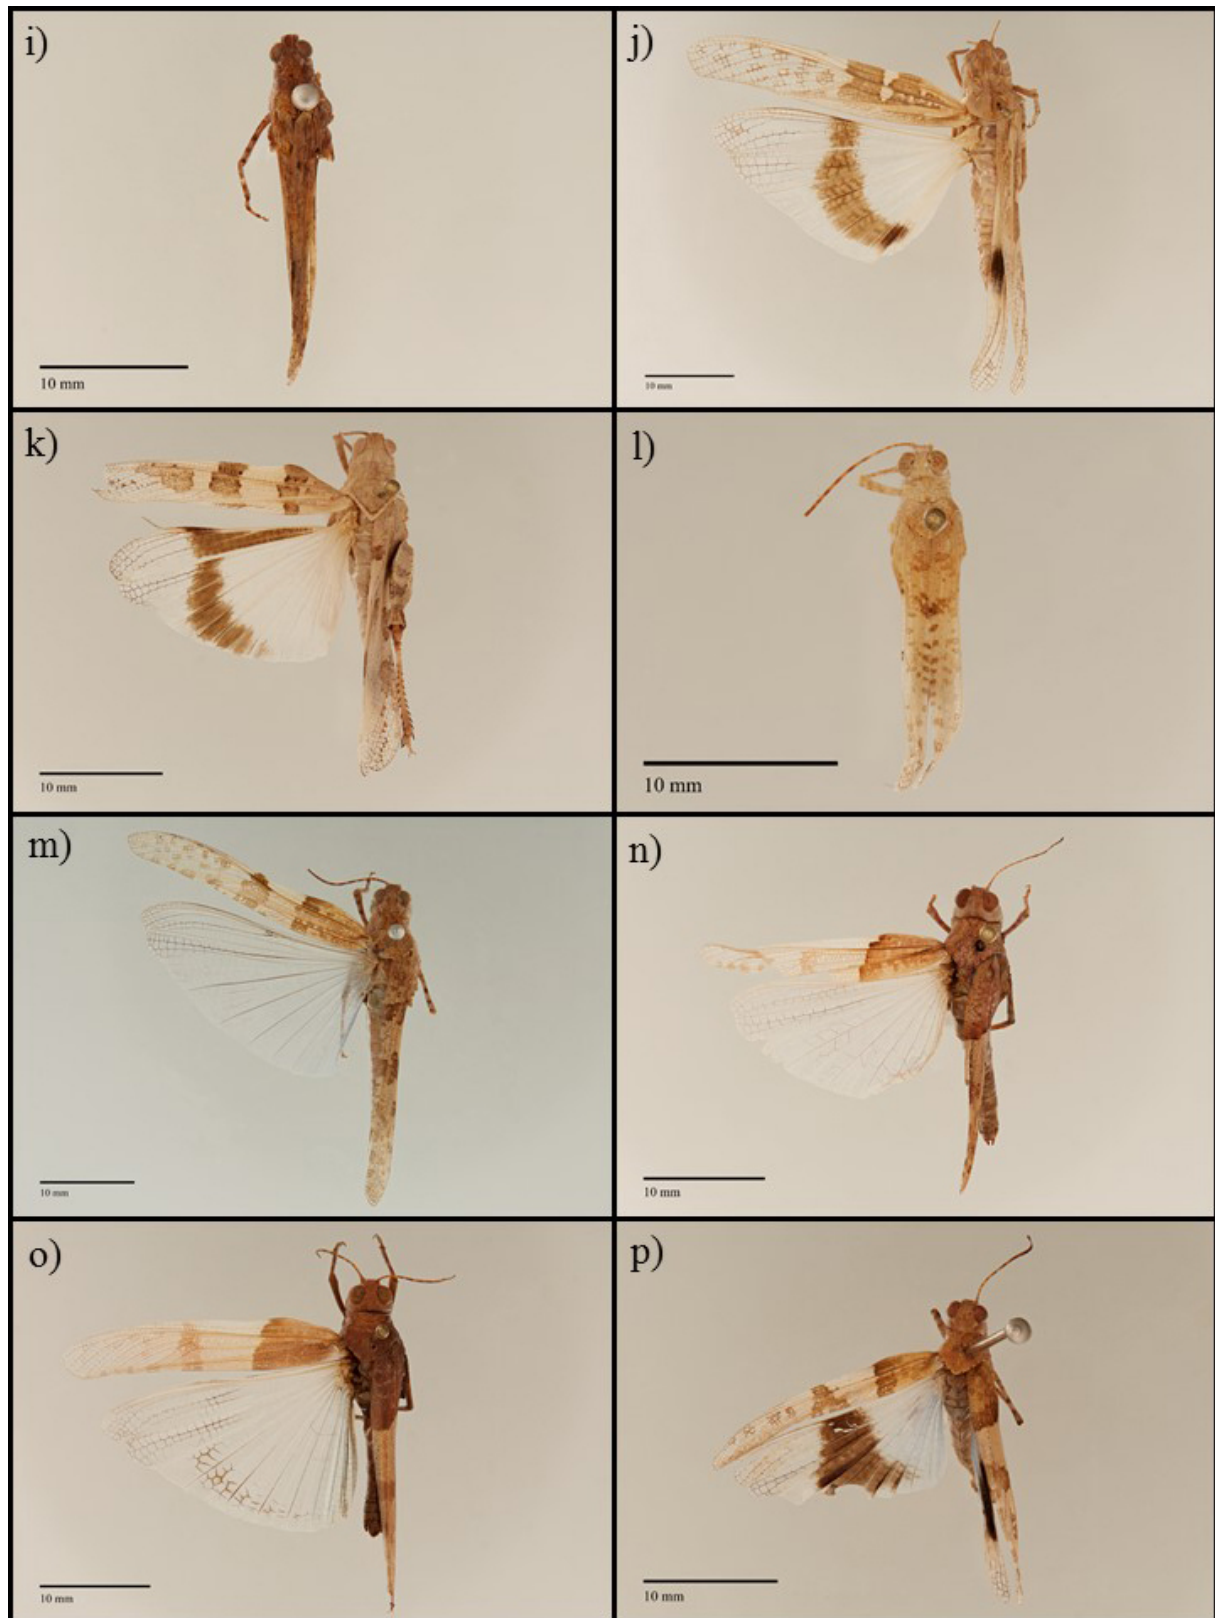

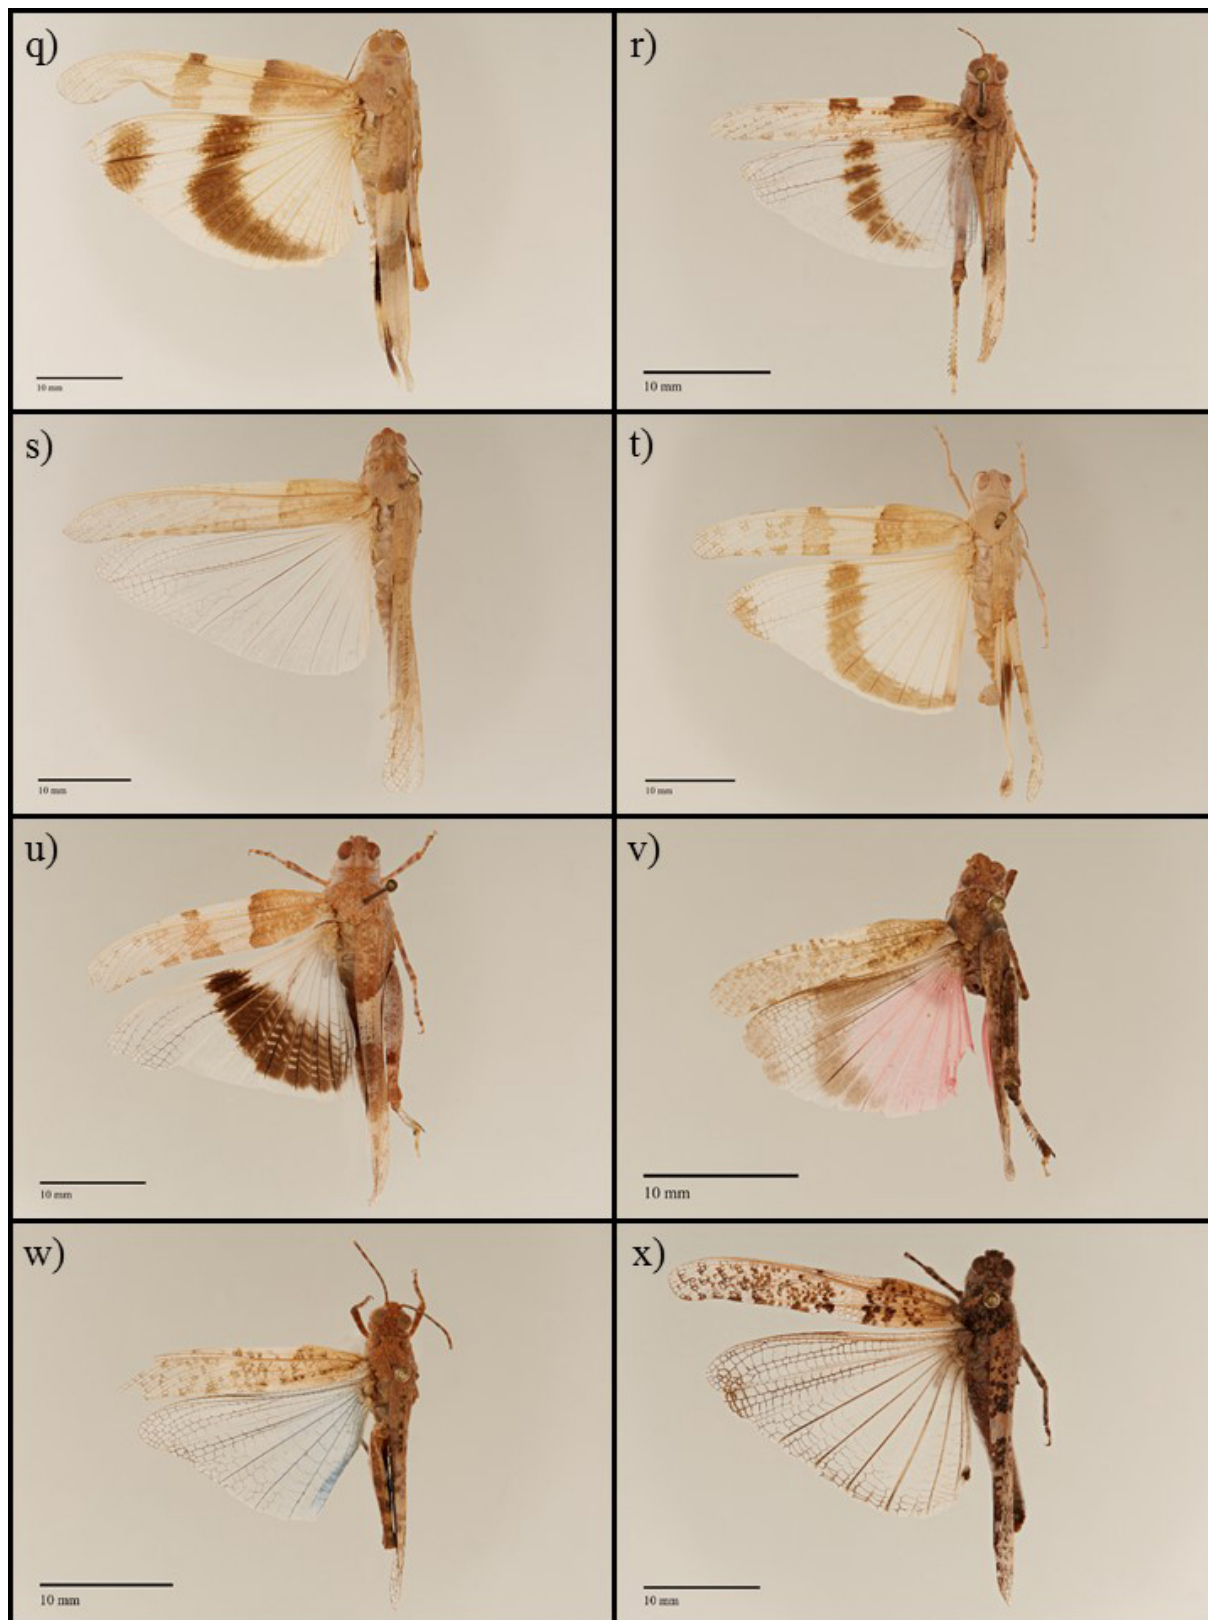

**Figure S2:** The following figures show the results of the species delimitation tools. We analyzed our data set using Automatic Barcode Gap Discovery - ABGD (Puillandre et al. 2012), *single threshold* General Mixed Yule Coalescent - *st*GMYC (Pons et al. 2006) and *multiple threshold* General Mixed Yule Coalescent - *mt*GMYC (Monaghan et al. 2009) method.

***Results from Automatic Barcode Gap Discovery – ABGD***

**Group[ 1 ] n: 6 ;id: Acrotylus\_insubricus\_Algeria\_D543**

Acrotylus\_insubricus\_Algeria\_D562  
Acrotylus\_insubricus\_Greece\_GBORT554-14  
Acrotylus\_insubricus\_La\_Gomera\_K164  
Acrotylus\_insubricus\_Morocco\_K224  
Acrotylus\_insubricus\_Algeria\_D542

**Group[ 2 ] n: 5 ;id: Acrotylus\_longipes\_Algeria\_D547**

Acrotylus\_longipes\_Gran\_Canary\_K26  
Acrotylus\_longipes\_Kos\_D326  
Acrotylus\_longipes\_Morocco\_K221  
Acrotylus\_longipes\_Algeria\_D546

**Group[ 3 ] n: 1 ;id: Acrotylus\_sp\_Kos\_D333**

**Group[ 4 ] n: 2 ;id: Aiolopus\_simulatrix\_Algeria\_D553**

Aiolopus\_simulatrix\_Algeria\_D555

**Group[ 5 ] n: 5 ;id: Aiolopus\_strepens\_Switzerland\_GBORT948-15**

Aiolopus\_strepens\_Switzerland\_GBORT950-15  
Aiolopus\_strepens\_Switzerland\_GBORT951-15  
Aiolopus\_strepens\_Croatia\_GBORT991-15  
Aiolopus\_strepens\_La\_Gomera\_K122

**Group[ 6 ] n: 8 ;id: Aiolopus\_thalassinus\_Algeria\_D549**

Aiolopus\_thalassinus\_Germany\_GBORT494-14  
Aiolopus\_thalassinus\_South\_Africa\_SISAF028-12  
Aiolopus\_thalassinus\_South\_Africa\_SISAF029-12  
Aiolopus\_thalassinus\_tamulus\_Pakistan\_MAORT573\_  
Aiolopus\_thalassinus\_tamulus\_Pakistan\_MAORT574\_11  
Aiolopus\_thalassinus\_tamulus\_Pakistan\_MAORT623\_11  
Aiolopus\_thalassinus\_tamulus\_Pakistan\_MAORT624\_11

**Group[ 7 ] n: 8 ;id: Aiolopus\_thalassinus\_Japan\_GBMOR360\_10**

Aiolopus\_thalassinus\_tamulus\_China\_GBMIN15684\_13  
Aiolopus\_thalassinus\_tamulus\_China\_GBMIN15685\_13  
Aiolopus\_thalassinus\_tamulus\_China\_GBMIN15686\_13  
Aiolopus\_thalassinus\_tamulus\_China\_GBMIN15687\_13  
Aiolopus\_thalassinus\_tamulus\_China\_GBMIN15860\_13  
Aiolopus\_thalassinus\_tamulus\_China\_GBMIN15861\_13  
Aiolopus\_thalassinus\_tamulus\_China\_GBMIN15862\_13

**Group[ 8 ] n: 6 ;id: Aiolopus\_thalassinus\_Australia\_OTAS280-12**

Aiolopus\_thalassinus\_Australia\_OTAS285-12  
Aiolopus\_thalassinus\_Australia\_OTAS286-12  
Aiolopus\_thalassinus\_Australia\_OTAS287-12  
Aiolopus\_thalassinus\_Australia\_OTAS288-12  
Aiolopus\_thalassinus\_Australia\_OTAS294-12

**Group[ 9 ] n: 4 ;id: Helioscirtus\_capsitanus\_Algeria\_D523**

Helioscirtus\_capsitanus\_Algeria\_D528  
Helioscirtus\_capsitanus\_Algeria\_D529  
Helioscirtus\_capsitanus\_Tunesia\_K370

**Group[ 10 ] n: 2 ;id: Hyalorhipis\_calcarata\_Algeria\_D584**

Hyalorhipis\_calcarata\_Algeria\_D585

**Group[ 11 ] n: 58 ;id: Leptopternis\_(ta\_Tunisia\_K379**

Leptopternis\_rothschildi\_Algeria\_D550  
Leptopternis\_rothschildi\_Algeria\_D568  
Leptopternis\_rothschildi\_Algeria\_D569  
Sphingonotus\_azurescens\_Portugal\_K762  
Sphingonotus\_azurescens\_Spain\_K405  
Sphingonotus\_azurescens\_Spain\_K763  
Sphingonotus\_caerulans\_Germany\_FBORT102-09  
Sphingonotus\_caerulans\_Germany\_FBORT166-09  
Sphingonotus\_caerulans\_Germany\_FBORT487-13  
Sphingonotus\_caerulans\_Germany\_FBORT499-13  
Sphingonotus\_caerulans\_France\_K315  
Sphingonotus\_caerulans\_Finland\_K608  
Sphingonotus\_caerulans\_Italy\_K613  
Sphingonotus\_caerulans\_Germany\_D1  
Sphingonotus\_caerulans\_Norway\_NOORT036-12

Sphingonotus\_caerulans\_Norway\_NOORT039-12  
Sphingonotus\_caerulans\_Norway\_NOORT042-12  
Sphingonotus\_caerulans\_Norway\_NOORT174-13  
Sphingonotus\_caerulans\_Norway\_NOORT175-13  
Sphingonotus\_canariensis\_Sokotra\_K731  
Sphingonotus\_canariensis\_Sokotra\_K732  
Sphingonotus\_ebneri\_Algeria\_D589  
Sphingonotus\_finotianus\_Algeria\_D596  
Sphingonotus\_finotianus\_Algeria\_D597  
Sphingonotus\_finotianus\_Tunisia\_K383  
Sphingonotus\_lluciapomaresi\_Spain\_K332  
Sphingonotus\_lucasii\_Algeria\_D587  
Sphingonotus\_lucasii\_Algeria\_D588  
Sphingonotus\_lucasii\_Morocco\_K522  
Sphingonotus\_lucasii\_Morocco\_K525  
Sphingonotus\_lucasii\_Tunisia\_K472  
Sphingonotus\_maroccanus\_Morocco\_K651  
Sphingonotus\_radioserratus\_Algeria\_D558  
Sphingonotus\_radioserratus\_Algeria\_D559  
Sphingonotus\_rubescens\_Algeria\_D519  
Sphingonotus\_rubescens\_Algeria\_D521  
Sphingonotus\_rubescens\_Algeria\_D573  
Sphingonotus\_rubescens\_Algeria\_D574  
Sphingonotus\_rubescens\_burri\_Cape\_Verde\_K497  
Sphingonotus\_rubescens\_fasciatus\_Kirgistan\_K748  
Sphingonotus\_rubescens\_Cape\_Verde\_K510  
Sphingonotus\_rubescens\_Gran\_Canaria\_K351  
Sphingonotus\_rubescens\_Gran\_Canaria\_D303  
Sphingonotus\_savignyi\_Algeria\_D518  
Sphingonotus\_savignyi\_Azerbaidzhan\_K621  
Sphingonotus\_savignyi\_Kenya\_D77  
Sphingonotus\_savignyi\_Kenya\_D79  
Sphingonotus\_savignyi\_Kenya\_D80  
Sphingonotus\_savignyi\_La\_Gomera\_K145  
Sphingonotus\_savignyi\_Tunisia\_K541  
Sphingonotus\_tricinctus\_Algeria\_D581  
Vosseleriana\_arabica\_galagheri\_Oman\_K564

Vosseleriana\_arabica\_galagheri\_Oman\_K579

Vosseleriana\_arabica\_Saudi\_Arabia\_D821

Vosseleriana\_fonti\_Algeria\_D560

Vosseleriana\_fonti\_Algeria\_D566

Vosseleriana\_fonti\_Algeria\_D567

**Group[ 12 ] n: 2 ;id:** Oedaleus\_abruptus\_China\_GBMIN15665\_13

Oedaleus\_abruptus\_China\_GBMIN15841\_13

**Group[ 13 ] n: 8 ;id:** Oedaleus\_decorus\_asiaticus\_China\_GBMIN15680\_13

Oedaleus\_decorus\_asiaticus\_China\_GBMIN15681\_13

Oedaleus\_decorus\_asiaticus\_China\_GBMIN15682\_13

Oedaleus\_decorus\_asiaticus\_China\_GBMIN15855\_13

Oedaleus\_decorus\_China\_GBMIN15677\_13

Oedaleus\_decorus\_China\_GBMIN15678\_13

Oedaleus\_senegalensis\_Algeria\_D526

Oedaleus\_senegalensis\_Algeria\_D533

**Group[ 14 ] n: 5 ;id:** Oedaleus\_infernalis\_China\_GBMIN15668\_13

Oedaleus\_infernalis\_China\_GBMIN15669\_13

Oedaleus\_infernalis\_Japan\_GBMOR359\_10

Oedaleus\_manjius\_China\_GBMIN15666\_13

Oedaleus\_manjius\_China\_GBMIN15842\_13

**Group[ 15 ] n: 9 ;id:** Oedipoda\_caerulescens\_Germany\_FBORT056-09

Oedipoda\_caerulescens\_Germany\_FBORT127-09

Oedipoda\_caerulescens\_Germany\_FBORT128-09

Oedipoda\_caerulescens\_Germany\_FBORT141-09

Oedipoda\_caerulescens\_Germany\_FBORT142-09

Oedipoda\_caerulescens\_Germany\_FBORT144-09

Oedipoda\_caerulescens\_Germany\_FBORT145-09

Oedipoda\_caerulescens\_Austria\_FBORT345-10

Oedipoda\_caerulescens\_Russia\_GBMOR531\_13

**Group[ 16 ] n: 1 ;id:** Oedipoda\_fedschenki\_GBMOR789\_13

**Group[ 17 ] n: 1 ;id:** Oedipoda\_fuscocincta\_Spain\_GBMOR1369\_15

**Group[ 18 ] n: 2 ;id:** Oedipoda\_miniata\_Algeria\_D531

Oedipoda\_miniata\_Algeria\_D535



**Group[ 19 ] n: 2 ;id: Oedipoda\_miniata\_Azerbaidshan\_K618**

Oedipoda\_miniata\_Azerbaidshan\_K626

**Group[ 20 ] n: 1 ;id: Oedipoda\_schochi\_Iran283**

**Group[ 21 ] n: 3 ;id: Sphingoderus\_carinatus\_Algeria\_D552**

Sphingoderus\_carinatus\_Algeria\_D570

Sphingoderus\_carinatus\_Tunisia\_K473

**Group[ 22 ] n: 6 ;id: Sphingonotus\_haitensis\_Dominican\_Republic\_K423**

Sphingonotus\_haitensis\_Dominican\_Republic\_T179

Sphingonotus\_haitensis\_Dominican\_Republic\_T180

Sphingonotus\_haitensis\_Dominican\_Republic\_T39

Sphingonotus\_haitensis\_Dominican\_Republic\_T40

Sphingonotus\_haitensis\_Dominican\_Republic\_T41

**Group[ 23 ] n: 4 ;id: Sphingonotus\_longipennis\_Pakistan\_MAORT581-11**

Sphingonotus\_longipennis\_Pakistan\_MAORT582-11

Sphingonotus\_longipennis\_Pakistan\_MAORT584-11

Sphingonotus\_longipennis\_Pakistan\_MAORT585-11

**Group[ 24 ] n: 2 ;id: Sphingonotus\_luteus\_Morocco\_K526**

Sphingonotus\_luteus\_Morocco\_K527

**Group[ 25 ] n: 3 ;id: Sphingonotus\_octofasciatus\_Algeria\_D516**

Sphingonotus\_octofasciatus\_Algeria\_D524

Sphingonotus\_octofasciatus\_Tunisia\_K470

**Group[ 26 ] n: 3 ;id: Spec\_Nov\_1\_Algeria\_D592**

Spec\_Nov\_1\_Algeria\_D593

Spec\_Nov\_1\_Algeria\_D594

**Group[ 27 ] n: 10 ;id: Thalpomena\_algeriana\_Algeria\_D563**

Thalpomena\_algeriana\_Algeria\_D564

Thalpomena\_coeruleipennis\_Morocco\_D113

Thalpomena\_coeruleipennis\_Morocco\_D115

Thalpomena\_coerulescens\_Algeria\_D599

Thalpomena\_coerulescens\_Algeria\_D600

Thalpomena\_coerulescens\_Morocco\_K227

Thalpomena\_viridipennis\_Morocco\_D161

Thalpomena\_viridipennis\_Morocco\_K641

Thalpomena\_viridipennis\_Morocco\_D152

Single threshold General Mixed Yule Coalescent – stGMYC

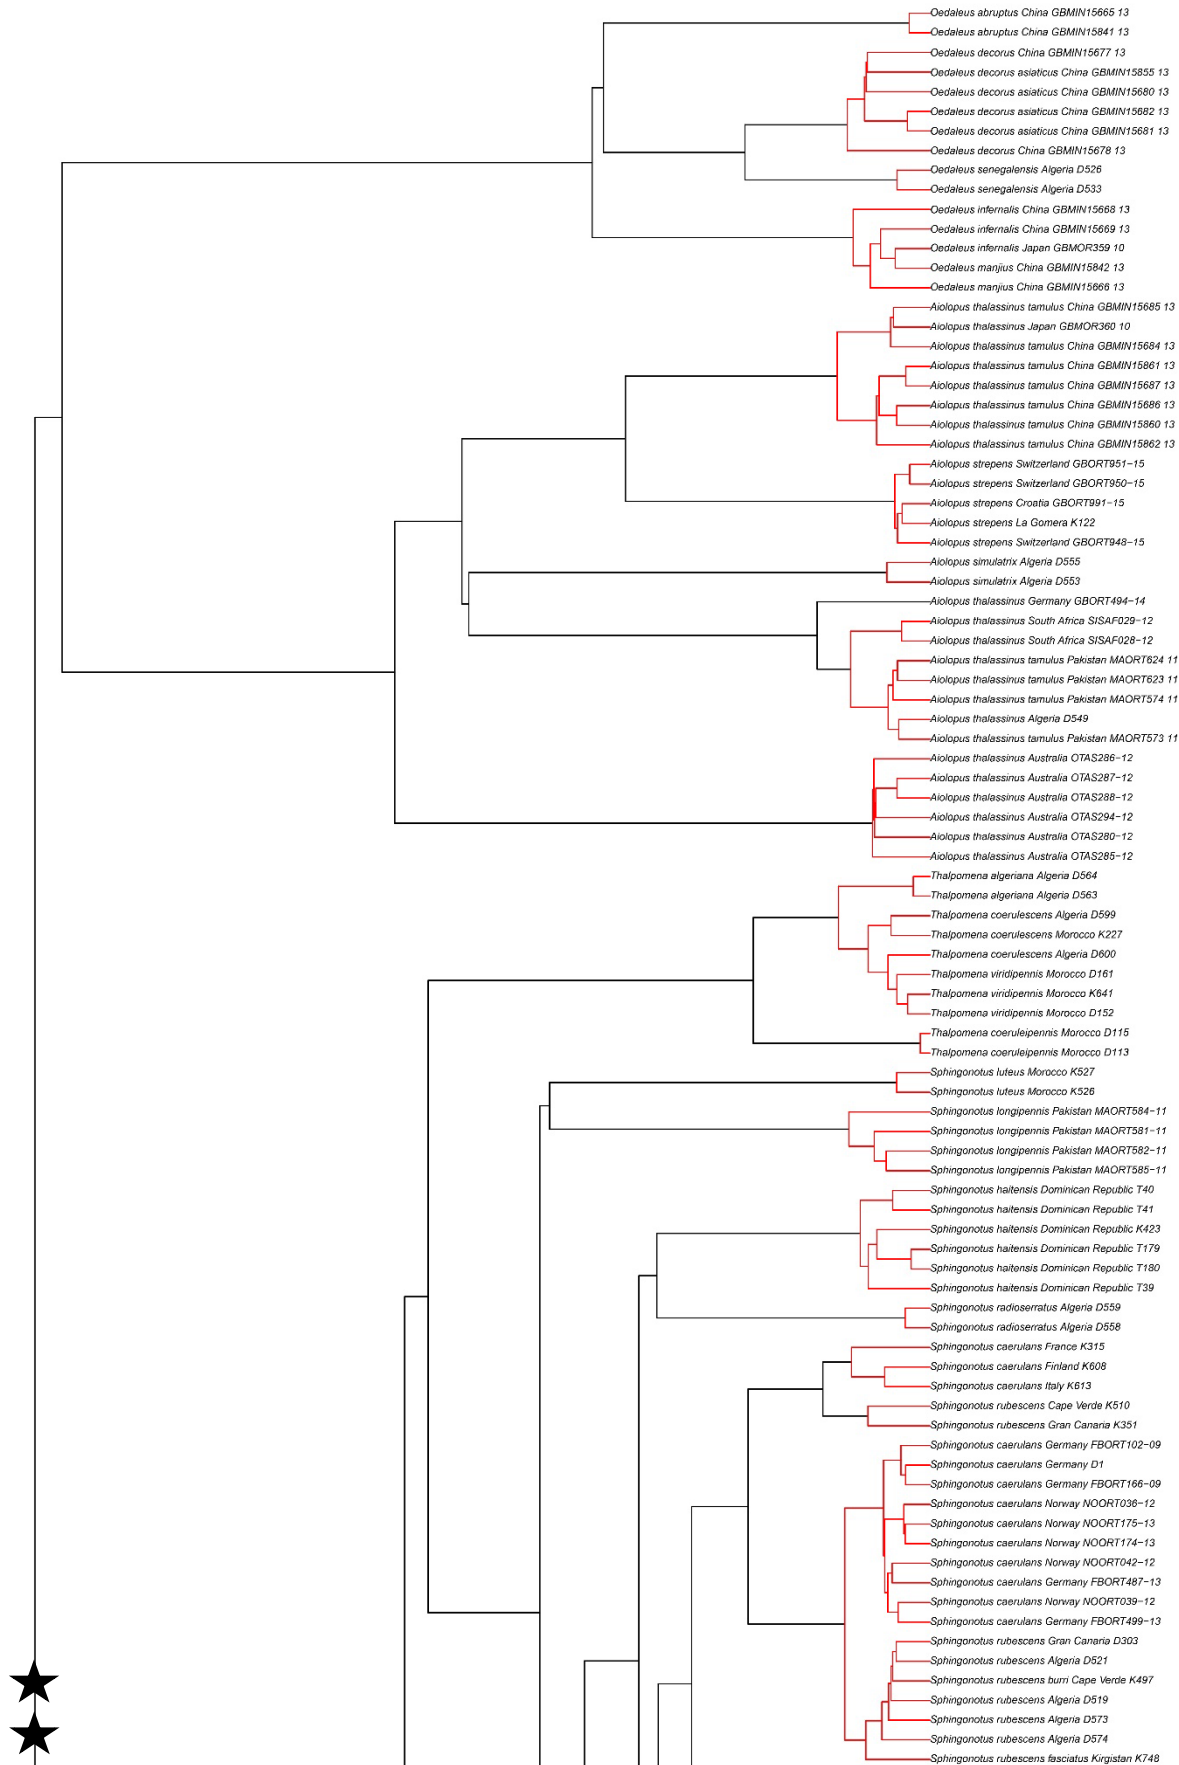

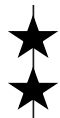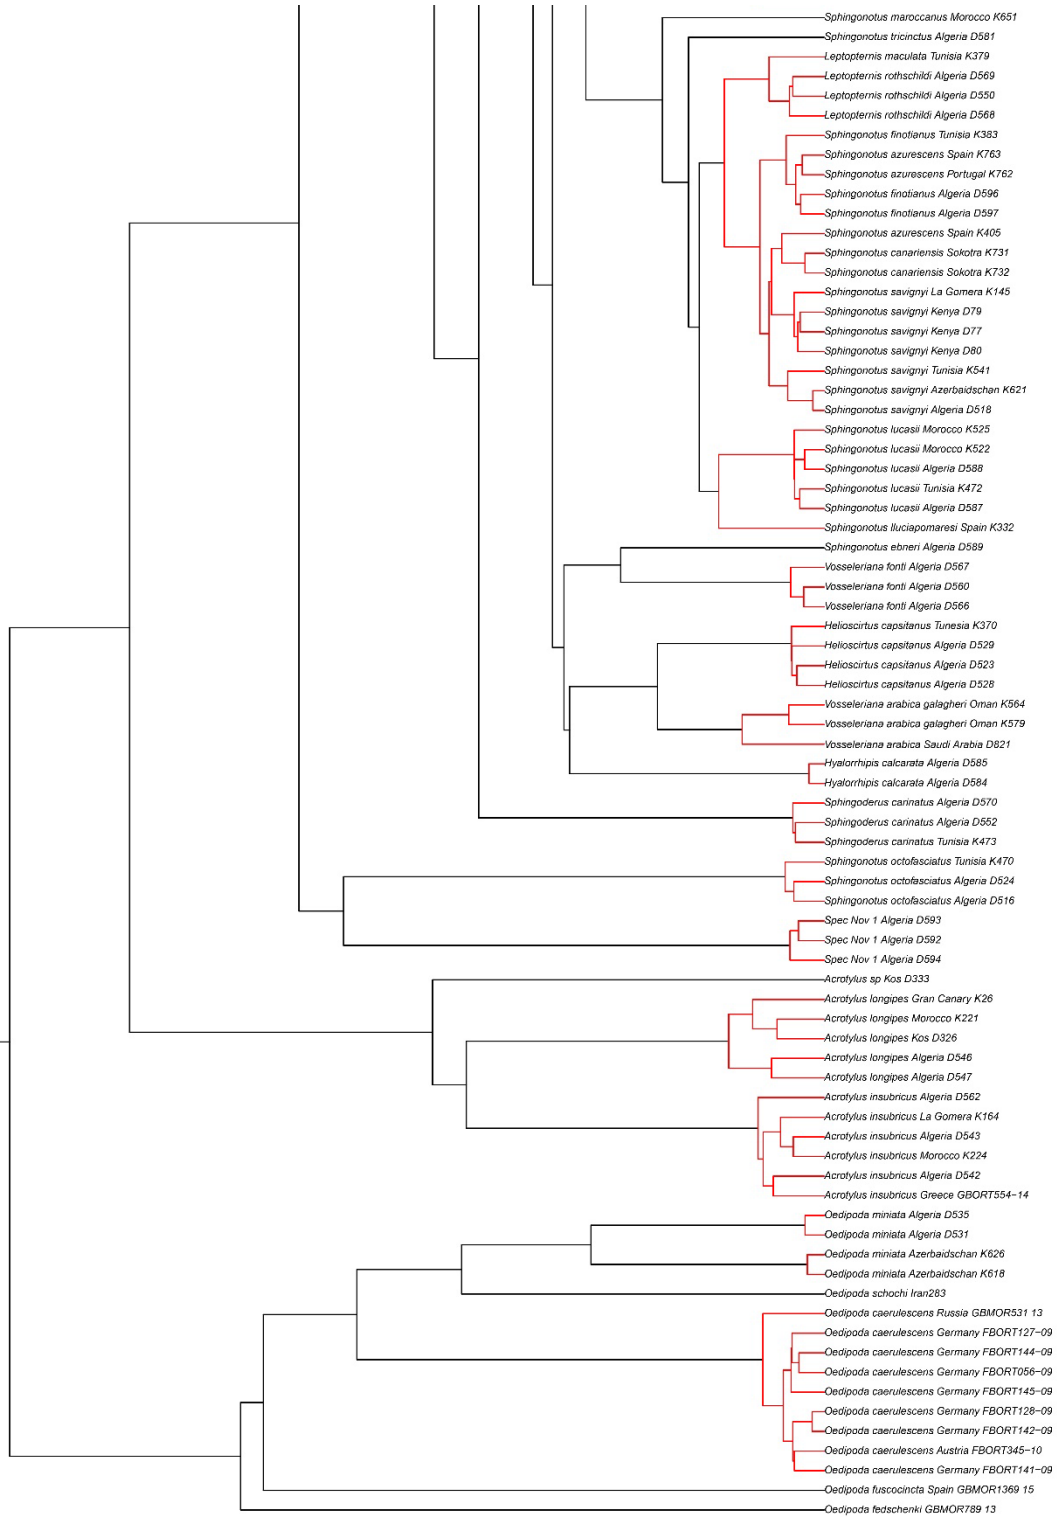

## Multiple threshold General Mixed Yule Coalescent – mtGMYC

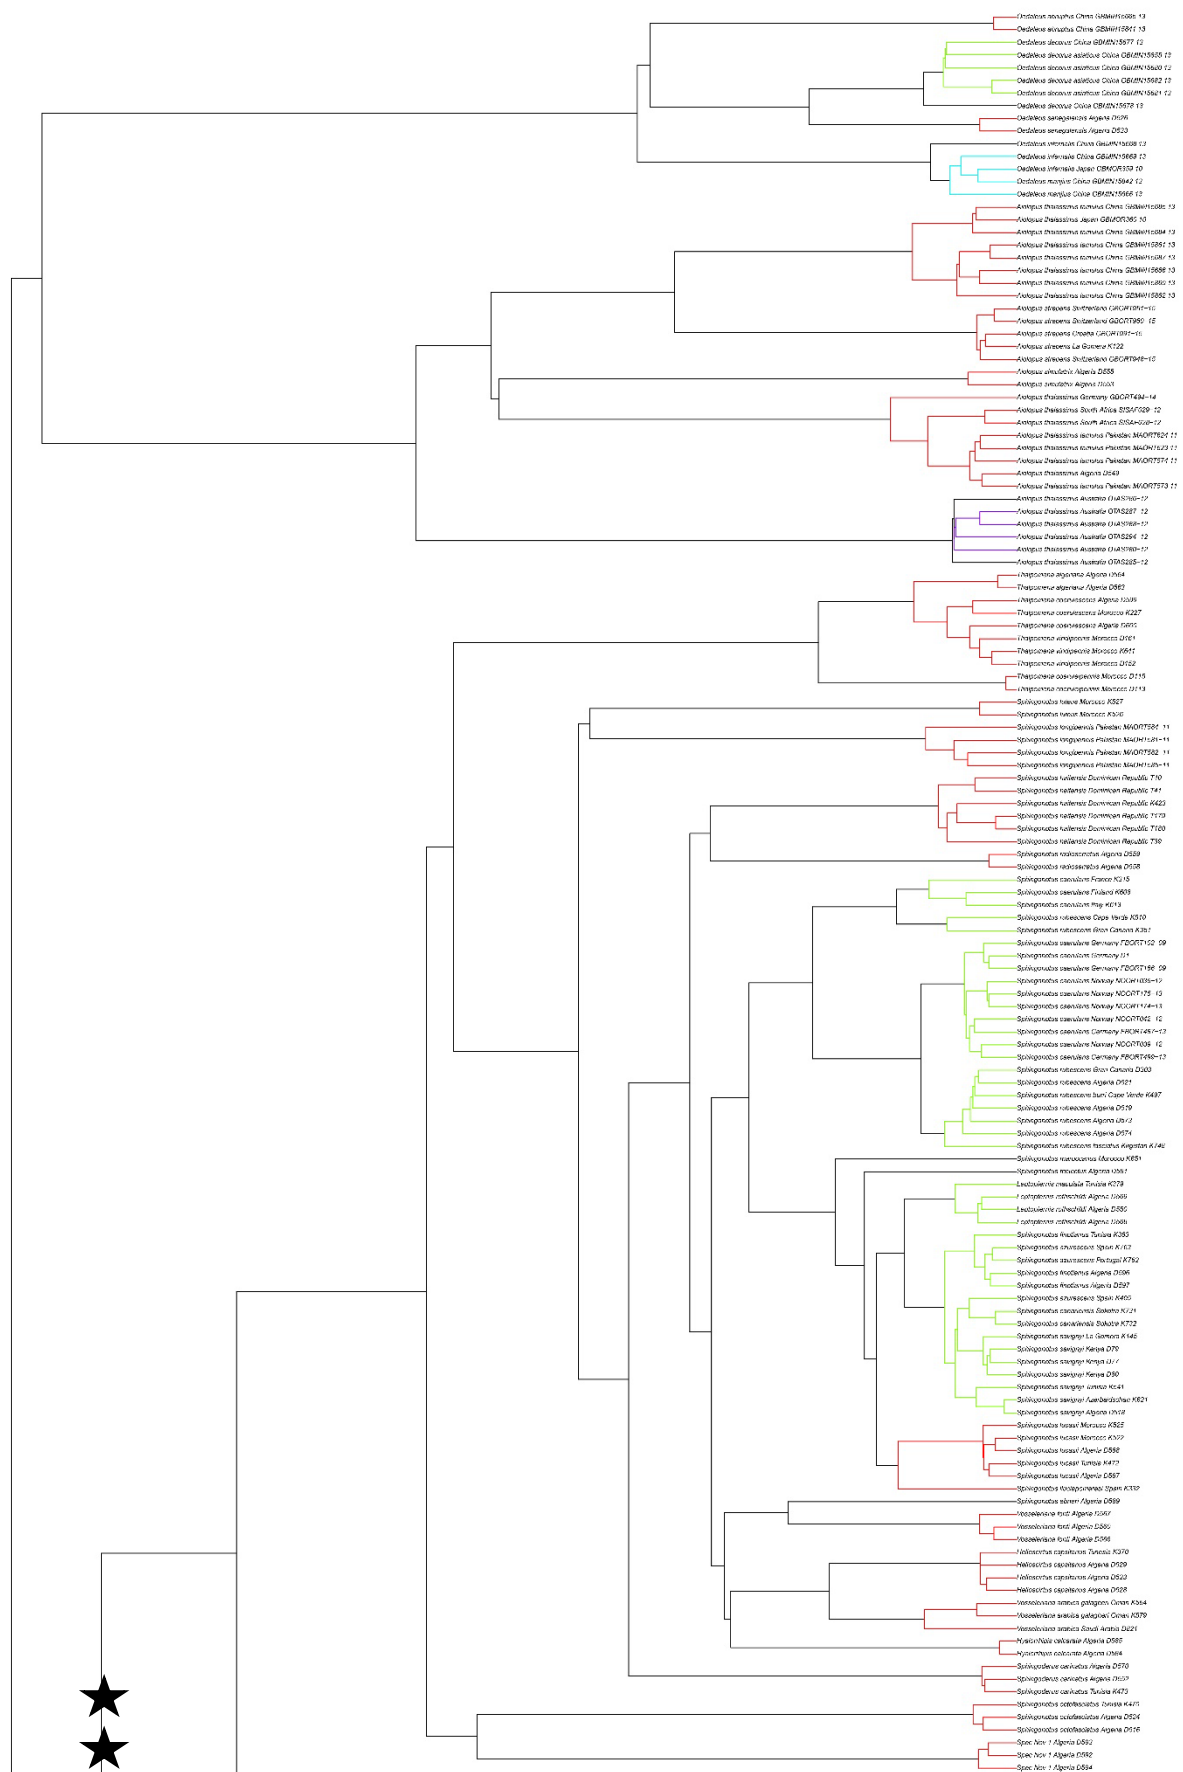

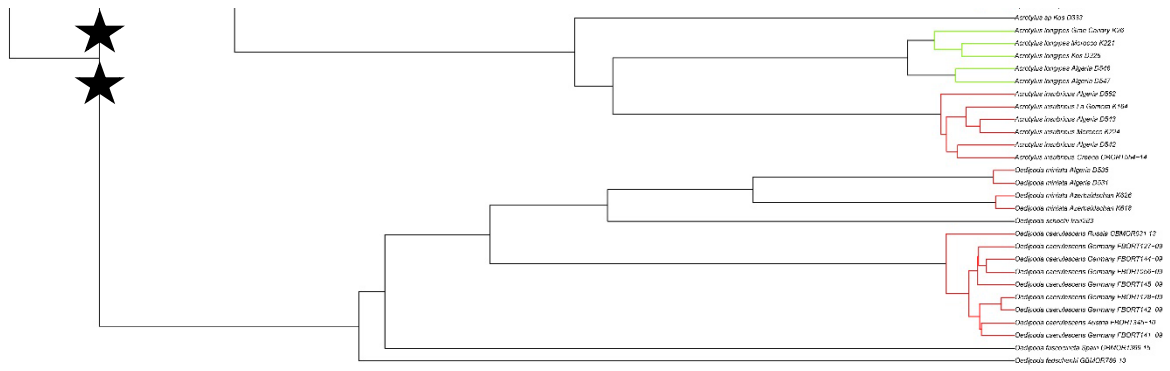

Supplement: Supplementary file 2 [file 1]
