# Supplementary material
Source: publisher figshare collection journal article supplement (https://tandf.figshare.com/articles/dataset/_/6351701)
Supplement: Supplementary file 1 [file 1]

## Supplementary Information

### First genetic data for band-winged grasshoppers (Orthoptera: Acrididae: Oedipodinae) of the Biskra region of Algeria with new records for the country

Abdelhamid Moussi, Lara-Sophie Dey, Daniel Petit, Abderrahmane Abba, Robert Klessner and Martin Husemann  
African Zoology 2018, 53(1): 31–40. <https://doi.org/10.1080/15627020.2018.1463172>

**Table S1:** Sampling locations with their codes, coordinates and elevation.

| Locality      | Codes | N             | E            | Elevation [m] |
|---------------|-------|---------------|--------------|---------------|
| Oualladja     | A     | 34°36'47.20"N | 6°39'6.99"E  | ~ 40          |
| Chetma        | B     | 34°51'3.40"N  | 5°50'25.74"E | ~ 110         |
| Djamorah      | C     | 35°3'53.80"N  | 5°48'41.54"E | ~ 465         |
| Biskra        | D     | 34°51'43.27"N | 5°41'50.44"E | ~ 118         |
| El Outaya     | E     | 34°57'47.09"N | 5°39'34.50"E | ~ 214         |
| Ain Ben Noui  | F     | 34°48'30.71"N | 5°39'18.29"E | ~ 116         |
| El Hadjeb     | G     | 34°47'29.44"N | 5°36'14.42"E | ~ 145         |
| Mekhadma      | H     | 34°39'10.13"N | 5°30'1.40"E  | ~ 86          |
| AinElkarma    | I     | 34°45'41.78"N | 5°31'14.53"E | ~ 1592        |
| Foghala       | J     | 34°45'29.91"N | 5°19'48.01"E | ~ 186         |
| Bir Naâm      | K     | 34°45'20.06"N | 5°8'1.11"E   | ~ 226         |
| Doucen        | L     | 34°32'30.93"N | 5°3'20.33"E  | ~ 214         |
| Ouled Djallal | M     | 34°29'23.78"N | 5°3'16.56"E  | ~ 222         |
| Beni Souik    | N     | 35°5'46.25"N  | 5°52'33.89"E | ~ 586         |
| Kantara       | O     | 35°9'41.09"N  | 5°37'53.81"E | ~ 416         |
| Chaiiba       | P     | 34°47'19.38"N | 5°2'46.93"E  | ~ 316         |
| Chelia*       | S     | 35°22'2.10"N  | 6°46'19.43"E | ~ 1255        |

\* Outside Wilaya

**Table S2:** Morphometric measurements of species recorded for the first time for Algeria and/or the Biskra region.

|                                | <i>n</i> | BodL   | L-B-teg | TegL   | HeadL | ProL  | HFemL  | HFemW |
|--------------------------------|----------|--------|---------|--------|-------|-------|--------|-------|
| <i>S. radioserratus</i>        |          |        |         |        |       |       |        |       |
| ♂♂                             | 7        | 23.31± | 17.40±  | 18.77± | 2.32± | 3.19± | 9.62±  | 2.57± |
|                                |          | 1.64   | 1.10    | 1.31   | 0.19  | 0.40  | 0.64   | 0.15  |
| ♀♀                             | 6        | 29.46± | 23.51±  | 23.54± | 2.73± | 4.79± | 12.18± | 3.23± |
|                                |          | 1.52   | 0.88    | 1.69   | 0.11  | 0.26  | 0.79   | 0.33  |
| <i>H. canescens</i>            |          |        |         |        |       |       |        |       |
| ♂♂                             | 2**      | 22.9±  | 18.45±  | 18.67± | 2.01± | 2.89± | 9.15±  | 1.81± |
|                                |          | 2.06   | 1.6     | 0.85   | 0.36  | 0.5   | 0.12   | 0.39  |
| ♀♀                             | 1**      | 34.97  | 27.97   | 28.65  | 3.25  | 5.06  | 12.62  | 2.42  |
| <i>H. capsitanus algericus</i> |          |        |         |        |       |       |        |       |
| ♂♂                             | 1        | 32.3   | 26.28   | 25.76  | 3.2   | 5.28  | 13.89  | 4.16  |
| ♀♀                             | 1*       | 35.62  | 27.99   | 27.84  | 3.59  | 6.03  | 14.72  | 3.9   |
| ♀♀                             | 2        | 35.68± | 27.66±  | 27.12± | 3.86± | 6.1±  | 14.41± | 4.25± |
|                                |          | 0.45   | 1.38    | 0.22   | 0.26  | 0.16  | 0.1    | 0.05  |
| <i>L. maculata</i>             |          |        |         |        |       |       |        |       |
| ♀♀                             | 1        | 23.365 | 18.73   | 18.825 | 2.25  | 3.48  | 11.635 | 2.81  |
| <i>O. fuscocincta</i>          |          |        |         |        |       |       |        |       |
| ♂♂                             | 3        | 29.95± | 22.4±   | 23.31± | 3.15± | 5.36± | 13.54± | 4.11± |
|                                |          | 1.3    | 1.43    | 1.56   | 0.28  | 0.48  | 0.51   | 0.04  |
| <i>O. senegalensis</i>         |          |        |         |        |       |       |        |       |
| ♂♂                             | 4        | 26.36± | 20.58±  | 20.22± | 3.12± | 3.55± | 12.25± | 2.68± |
|                                |          | 3.2    | 3       | 3.05   | 0.2   | 0.6   | 1.82   | 0.38  |
| ♀♀                             | 2        | 37.37± | 30.80±  | 29.05± | 4.31± | 5.42± | 17.93± | 4.08± |
|                                |          | 1.84   | 2.70    | 1.89   | 0.11  | 0.18  | 0.014  | 0.01  |
| <i>S. obscuratus lameerei</i>  |          |        |         |        |       |       |        |       |
| ♂♂                             | 2*       | 44±    | 32.3±   | 35.4±  | 3.7±  | 5.7±  | 14.8±  | 3.7±  |
|                                |          | 1.2    | 0.1     | 1.3    | 0.2   | 0.7   | 0.1    | 0.2   |
| ♀♀                             | 2*       | 44.5±  | 33.9±   | 35.8±  | 4.1±  | 5.8±  | 15.4±  | 3.8±  |
|                                |          | 1.3    | 1.2     | 1.6    | 0.5   | 0.9   | 0.7    | 0.1   |
| <i>S. finotianus</i>           |          |        |         |        |       |       |        |       |
| ♂♂                             | 3        | 28.65± | 21.53±  | 22.47± | 3.08± | 4.06± | 10.29± | 3.06± |
|                                |          | 0.57   | 0.29    | 0.97   | 0.1   | 0.48  | 0.3    | 0.09  |
| ♀♀                             | 4        | 31.96  | 24.96   | 25.05  | 3.28  | 5.01  | 12.52  | 3.8   |
|                                |          | 1.85   | 2.23    | 1.3    | 0.47  | 0.54  | 1.07   | 0.26  |
| <i>T. coerulescens</i>         |          |        |         |        |       |       |        |       |
| ♂♂                             | 12       | 23.3±  | 17.65±  | 18.73± | 2.72± | 3.36± | 9.82±  | 2.93± |
|                                |          | 1.26   | 1.06    | 1.15   | 0.25  | 0.33  | 0.54   | 0.21  |
| ♀♀                             | 13       | 27.91± | 22.41±  | 22.12± | 3.28± | 4.2±  | 11.76± | 3.58± |
|                                |          | 1.7    | 1.25    | 1.45   | 0.21  | 0.39  | 0.59   | 0.3   |
| <i>V. fonti</i>                |          |        |         |        |       |       |        |       |

|                              |       |                |                |                |               |               |                |               |
|------------------------------|-------|----------------|----------------|----------------|---------------|---------------|----------------|---------------|
| ♂♂                           | 8     | 21.9±<br>0.9   | 29±<br>1       | 23.2±<br>1.2   | 2.9±<br>0.4   | 4.3±<br>0.3   | 11.5±<br>0.4   | 3.2±<br>0.1   |
| ♀♀                           | 3     | 25.1±<br>0.9   | 31.1±<br>0.9   | 24.6±<br>0.4   | 2.9±<br>0.2   | 5.1±<br>0.3   | 12.7±<br>0.6   | 3.3±<br>0.5   |
| <b><i>L. rothschildi</i></b> |       |                |                |                |               |               |                |               |
| ♂♂                           | 4     | 21.23<br>1.07  | 14.41<br>1     | 17.25<br>1.03  | 1.92<br>0.11  | 2.57<br>0.25  | 8.52<br>0.41   | 2.05<br>0.05  |
| ♀♀                           | 12    | 28.99±<br>1.77 | 21.31±<br>1.09 | 24.02±<br>1.72 | 2.45±<br>0.22 | 3.78±<br>0.41 | 11.51±<br>0.77 | 2.57±<br>0.13 |
| <b><i>L. gracilis</i></b>    |       |                |                |                |               |               |                |               |
| ♂♂                           | 1***  | 23.87          | 17.96          | 19.01          | 2.45          | 3.59          | 9.66           | 2.09          |
| ♀♀                           | 1**** | 30.25          | 21.82          | 24.84          | 2.71          | 4.37          | 12.48          | 2.74          |

\* Beni Ounif (Béchar) [MNCN]

\*\* Oued Mya (Ouargla) & El Golea (Ghardaia) [MNCN]

\*\*\* 1♂ - Turkmenistán: St. [Station] Repetek, Zakasp. [Zakaspiskaya] Zh. D. [= railway], VI-VII.30. Luppova. MNCN\_Ent 195789.

\*\*\*\* 1♀ - Azerbaiyán: Najicheván: Disar bl. [blis (= near)] Ordubada, Najich. [Najichevan] Kr [Krai (= area)], 25.VII.1933. Znoiko. MNCN\_Ent 195788.

**Table S3:** List of all individuals used in this study and their corresponding genus, species and country. We further provide the BOLD ID, Project ID/GenBank ID for specimens used for phylogenetic reconstruction, sex, collection date, collector, location and reference. Collector abbreviations: MH – Martin Husemann, AH – Axel Hochkirch, AM – Abdelhamid Moussi. References can be found below the table.

| Genus                   | Species           | Country/Island | BOLD ID     | Project ID/Genbank ID | Collection date | Collector  | Location                               | Reference                |
|-------------------------|-------------------|----------------|-------------|-----------------------|-----------------|------------|----------------------------------------|--------------------------|
| <b><i>Acrotylus</i></b> |                   |                |             |                       |                 |            |                                        |                          |
| <i>Acrotylus</i>        | <i>insubricus</i> | Algeria        | OBAL001-18  | D542                  | 30.10.2008      | AM         | Algeria, Mekhadama                     | This study               |
| <i>Acrotylus</i>        | <i>insubricus</i> | Algeria        | OBAL002-18  | D543                  | 16.04.2009      | AM         | Algeria, Biskar (Agba)                 | This study               |
| <i>Acrotylus</i>        | <i>insubricus</i> | Algeria        | OBAL003-18  | D562                  | 16.04.2009      | AM         | Algeria, A Bennoui                     | This study               |
| <i>Acrotylus</i>        | <i>insubricus</i> | Greece         | GBORT554-14 | N.a.                  | 11.06.2014      | H. Muehle  | Greece, Rodopi                         | Hawlitshchek et al. 2017 |
| <i>Acrotylus</i>        | <i>insubricus</i> | La Gomera      | OBAL004-18  | K164                  | 05.04.2004      | AH         | Spain, la Gomera, Barranco de la Junta | This study               |
| <i>Acrotylus</i>        | <i>insubricus</i> | Morocco        | OBAL005-18  | K224                  | 09.03.2005      | AH         | Morocco, Agadir-Izouika                | This study               |
| <i>Acrotylus</i>        | <i>longipes</i>   | Kos            | OBAL006-18  | D326                  | 04.11.2014      | MH         | Greece, Kos                            | This study               |
| <i>Acrotylus</i>        | <i>longipes</i>   | Algeria        | OBAL007-18  | D546                  | 23.05.2008      | AM         | Algeria, Mekhadama                     | This study               |
| <i>Acrotylus</i>        | <i>longipes</i>   | Algeria        | OBAL008-18  | D547                  | 25.06.2009      | AM         | Algeria, Bir Naam                      | This study               |
| <i>Acrotylus</i>        | <i>longipes</i>   | Morocco        | OBAL009-18  | K221                  | 09.03.2005      | AH         | Morocco, Tifnite                       | This study               |
| <i>Acrotylus</i>        | <i>longipes</i>   | Gran Canary    | OBAL010-18  | K26                   | 13.02.2003      | AH         | Spain, Gran Canaria, Maspalomas        | This study               |
| <i>Acrotylus</i>        | <i>sp</i>         | Kos            | OBAL011-18  | D333                  | 02.11.2014      | MH         | Greece, Kos                            | This study               |
| <b><i>Aiolopus</i></b>  |                   |                |             |                       |                 |            |                                        |                          |
| <i>Aiolopus</i>         | <i>simulatrix</i> | Algeria        | OBAL012-18  | D553                  | 01.11.2008      | AM         | Algeria, Ouelladja                     | This study               |
| <i>Aiolopus</i>         | <i>simulatrix</i> | Algeria        | OBAL013-18  | D555                  | 01.11.2008      | AM         | Algeria, Ouelladja                     | This study               |
| <i>Aiolopus</i>         | <i>strepens</i>   | Switzerland    | GBORT948-15 | N.a.                  | 10.08.2004      | Ch. Roesti | Switzerland, TI, Genestrerio           | Hawlitshchek et al. 2017 |
| <i>Aiolopus</i>         | <i>strepens</i>   | Switzerland    | GBORT950-15 | N.a.                  | 12.08.2003      | Ch. Roesti | Switzerland, TI, Figino, Molino        | Hawlitshchek et al. 2017 |
| <i>Aiolopus</i>         | <i>strepens</i>   | Switzerland    | GBORT951-15 | N.a.                  | 12.08.2003      | Ch. Roesti | Switzerland, TI, Figino, Molino        | Hawlitshchek et al. 2017 |

|                 |                    |              |             |          |            |                       |                                                                                   |                         |
|-----------------|--------------------|--------------|-------------|----------|------------|-----------------------|-----------------------------------------------------------------------------------|-------------------------|
| <i>Aiolopus</i> | <i>strepens</i>    | Croatia      | GBORT991-15 | N.a.     | 05.04.2015 |                       | Croatia, Halbinsel Vir                                                            | Hawlitcshek et al. 2017 |
| <i>Aiolopus</i> | <i>strepens</i>    | La Gomera    | OBAL014-18  | K122     |            |                       |                                                                                   |                         |
| <i>Aiolopus</i> | <i>thalassinus</i> | Algeria      | OBAL015-18  | D549     | 14.10.2008 | AM                    | Algeria, Mekhadama                                                                |                         |
| <i>Aiolopus</i> | <i>thalassinus</i> | Japan        | GBMOR360-10 | AB497588 | 02.01.2008 |                       | Japan, Okinawa, Miyako Island                                                     | Tokuda et al. 2010      |
| <i>Aiolopus</i> | <i>thalassinus</i> | Germany      | GBORT494-14 | N.a.     | 22.08.2002 | P. Detzel             | Germany, Baden-Württemberg, Erddeponie, am Sulzbach, Heitersheim- Rudera          | Hawlitcshek et al. 2017 |
| <i>Aiolopus</i> | <i>thalassinus</i> | Australia    | OTAS280-12  | N.a.     | 08.12.2011 | P. Hebert             | Australia, South Australia, Lyrup Forest Reserve                                  |                         |
| <i>Aiolopus</i> | <i>thalassinus</i> | Australia    | OTAS285-12  | N.a.     | 08.12.2011 | P. Hebert             | Australia, South Australia, Lyrup Forest Reserve                                  |                         |
| <i>Aiolopus</i> | <i>thalassinus</i> | Australia    | OTAS286-12  | N.a.     | 08.12.2011 | P. Hebert             | Australia, South Australia, Lyrup Forest Reserve                                  |                         |
| <i>Aiolopus</i> | <i>thalassinus</i> | Australia    | OTAS287-12  | N.a.     | 08.12.2011 | P. Hebert             | Australia, South Australia, Lyrup Forest Reserve                                  |                         |
| <i>Aiolopus</i> | <i>thalassinus</i> | Australia    | OTAS288-12  | N.a.     | 08.12.2011 | P. Hebert             | Australia, South Australia, Lyrup Forest Reserve                                  |                         |
| <i>Aiolopus</i> | <i>thalassinus</i> | Australia    | OTAS294-12  | N.a.     | 08.12.2011 | P. Hebert             | Australia, South Australia, Lyrup Forest Reserve                                  |                         |
| <i>Aiolopus</i> | <i>thalassinus</i> | South Africa | SISAF028-12 | N.a.     | 14.02.2012 | P. Hebert, J. deWaard | South Africa, Gauteng, Hekpoort, Mogale`s Gate Biodiversity Centre, nr. Bush camp |                         |
| <i>Aiolopus</i> | <i>thalassinus</i> | South Africa | SISAF029-12 | N.a.     | 14.02.2012 | P. Hebert, J. deWaard | South Africa, Gauteng, Hekpoort, Mogale`s Gate Biodiversity Centre, nr. Bush camp |                         |

|                            |                    |          |               |          |            |            |                                                          |                          |
|----------------------------|--------------------|----------|---------------|----------|------------|------------|----------------------------------------------------------|--------------------------|
| <i>Aiolopus</i>            | <i>thalassinus</i> | China    | GBMIN15684-13 | KC140014 | 17.09.2009 | Jianhua    | China                                                    | Huang et al. 2013        |
| <i>Aiolopus</i>            | <i>tamulus</i>     |          |               |          |            | Huang      |                                                          |                          |
| <i>Aiolopus</i>            | <i>thalassinus</i> | China    | GBMIN15685-13 | KC140012 | 03.11.2008 | Jianhua    | China                                                    | Huang et al. 2013        |
| <i>Aiolopus</i>            | <i>tamulus</i>     |          |               |          |            | Huang      |                                                          |                          |
| <i>Aiolopus</i>            | <i>thalassinus</i> | China    | GBMIN15686-13 | KC140010 | 03.11.2008 | Jianhua    | China                                                    | Huang et al. 2013        |
| <i>Aiolopus</i>            | <i>tamulus</i>     |          |               |          |            | Huang      |                                                          |                          |
| <i>Aiolopus</i>            | <i>thalassinus</i> | China    | GBMIN15687-13 | KC140008 | 03.11.2008 | Jianhua    | China                                                    | Huang et al. 2013        |
| <i>Aiolopus</i>            | <i>tamulus</i>     |          |               |          |            | Huang      |                                                          |                          |
| <i>Aiolopus</i>            | <i>thalassinus</i> | China    | GBMIN15860-13 | KC140013 | 17.09.2009 | Jianhua    | China                                                    | Huang et al. 2013        |
| <i>Aiolopus</i>            | <i>tamulus</i>     |          |               |          |            | Huang      |                                                          |                          |
| <i>Aiolopus</i>            | <i>thalassinus</i> | China    | GBMIN15861-13 | KC140011 | 03.11.2008 | Jianhua    | China                                                    | Huang et al. 2013        |
| <i>Aiolopus</i>            | <i>tamulus</i>     |          |               |          |            | Huang      |                                                          |                          |
| <i>Aiolopus</i>            | <i>thalassinus</i> | China    | GBMIN15862-13 | KC140009 | 03.11.2008 | Jianhua    | China                                                    | Huang et al. 2013        |
| <i>Aiolopus</i>            | <i>tamulus</i>     |          |               |          |            | Huang      |                                                          |                          |
| <i>Aiolopus</i>            | <i>thalassinus</i> | Pakistan | MAORT573-11   | KJ672123 | 02.08.2010 | A. Tamkeen | Pakistan: AJK, Samhani                                   | Nazir et al. unpub.      |
| <i>Aiolopus</i>            | <i>tamulus</i>     |          |               |          |            |            |                                                          |                          |
| <i>Aiolopus</i>            | <i>thalassinus</i> | Pakistan | MAORT574-11   | KJ672125 | 24.09.2007 | A. Tamkeen | Pakistan: AJK, Jatlan                                    | Nazir et al. unpub.      |
| <i>Aiolopus</i>            | <i>tamulus</i>     |          |               |          |            |            |                                                          |                          |
| <i>Aiolopus</i>            | <i>thalassinus</i> | Pakistan | MAORT623-11   | KJ672124 | 25.06.2010 | A. Tamkeen | Pakistan: AJK, Rawalakot                                 | Nazir et al. unpub.      |
| <i>Aiolopus</i>            | <i>tamulus</i>     |          |               |          |            |            |                                                          |                          |
| <i>Aiolopus</i>            | <i>thalassinus</i> | Pakistan | MAORT624-11   | KJ672126 | 25.06.2010 | A. Tamkeen | Pakistan: AJK, Rawalakot                                 | Nazir et al. unpub.      |
| <i>Aiolopus</i>            | <i>tamulus</i>     |          |               |          |            |            |                                                          |                          |
| <b><i>Anacridium</i></b>   |                    |          |               |          |            |            |                                                          |                          |
| <i>Anacridium</i>          | <i>aegyptium</i>   | Germany  | FBORT381-10   | HQ955732 | 28.02.1986 | P. Detzel  | Germany, Bavaria, Oberbayern, Muenchen, Aubing, Friedhof | Hawlitshchek et al. 2017 |
| <i>Anacridium</i>          | <i>aegyptium</i>   | Greece   | GBMIX951-14   | N.a.     | 01.06.2014 | H. Muehle  | Greece, Drama, 9 km SW Paranesti                         | Hawlitshchek et al. 2017 |
| <i>Anacridium</i>          | <i>aegyptium</i>   |          | GBMOR813-13   | KC261371 |            |            |                                                          | Bugrov et al. unpub.     |
| <b><i>Helioscirtus</i></b> |                    |          |               |          |            |            |                                                          |                          |
| <i>Helioscirtus</i>        | <i>capsitanus</i>  | Algeria  | OBAL016-18    | D523     | 18.05.2013 | AM         | Algeria, Kantara                                         |                          |
| <i>Helioscirtus</i>        | <i>capsitanus</i>  | Algeria  | OBAL017-18    | D528     | 18.05.2013 | AM         | Algeria, Kantara                                         |                          |
| <i>Helioscirtus</i>        | <i>capsitanus</i>  | Algeria  | OBAL018-18    | D529     | 18.05.2013 | AM         | Algeria, Kantara                                         |                          |
| <i>Helioscirtus</i>        | <i>capsitanus</i>  | Tunisia  | OBAL019-18    | K370     | 27.07.2006 | AH         | Tunisia, Fériana                                         |                          |

***Hyalorhipis***

|                    |                  |         |            |      |            |    |                   |
|--------------------|------------------|---------|------------|------|------------|----|-------------------|
| <i>Hyalorhipis</i> | <i>calcarata</i> | Algeria | OBAL020-18 | D584 | 04.07.2011 | AM | Algeria, Bir Naam |
| <i>Hyalorhipis</i> | <i>calcarata</i> | Algeria | OBAL021-18 | D585 | 04.07.2011 | AM | Algeria, Bir Naam |

***Leptopternis***

|                     |                    |         |            |      |            |    |                     |
|---------------------|--------------------|---------|------------|------|------------|----|---------------------|
| <i>Leptopternis</i> | <i>maculatus</i>   | Tunisia | OBAL022-18 | K379 | 23.07.2006 | AH | Tunisia, Ouesslatia |
| <i>Leptopternis</i> | <i>rothschildi</i> | Algeria | OBAL023-18 | D550 | 15.08.2009 | AM | Algeria, Bir Naam   |
| <i>Leptopternis</i> | <i>rothschildi</i> | Algeria | OBAL024-18 | D568 | 04.07.2011 | AM | Algeria, Bir Naam   |
| <i>Leptopternis</i> | <i>rothschildi</i> | Algeria | OBAL025-18 | D569 | 04.07.2011 | AM | Algeria, Bir Naam   |

***Oedaleus***

|                 |                          |       |               |          |            |               |                                        |                    |
|-----------------|--------------------------|-------|---------------|----------|------------|---------------|----------------------------------------|--------------------|
| <i>Oedaleus</i> | <i>abruptus</i>          | China | GBMIN15665-13 | KC140052 | 18.09.2009 | Jianhua Huang | China                                  | Huang et al. 2013  |
| <i>Oedaleus</i> | <i>abruptus</i>          | China | GBMIN1584-131 | KC140051 | 18.09.2009 | Jianhua Huang | China                                  | Huang et al. 2013  |
| <i>Oedaleus</i> | <i>decorus</i>           | China | GBMIN15677-13 | KC140028 | 16.08.2006 | Xin Li        | China                                  | Huang et al. 2013  |
| <i>Oedaleus</i> | <i>decorus</i>           | China | GBMIN15678-13 | KC140026 | 24.08.2005 |               | China                                  | Huang et al. 2013  |
| <i>Oedaleus</i> | <i>decorus asiaticus</i> | China | GBMIN15680-13 | KC140022 | 24.07.2007 | Weigong Wang  | China                                  | Huang et al. 2013  |
| <i>Oedaleus</i> | <i>decorus asiaticus</i> | China | GBMIN15681-13 | KC140020 | 24.07.2007 | Weigong Wang  | China                                  | Huang et al. 2013  |
| <i>Oedaleus</i> | <i>decorus asiaticus</i> | China | GBMIN15682-13 | KC140018 | 24.07.2007 | Weigong Wang  | China                                  | Huang et al. 2013  |
| <i>Oedaleus</i> | <i>decorus asiaticus</i> | China | GBMIN15855-13 | KC140023 | 27.07.2007 | Chengying Pan | China                                  | Huang et al. 2013  |
| <i>Oedaleus</i> | <i>infernalis</i>        | China | GBMIN15668-13 | KC140046 | 04.08.2007 | Wei Ye        | China                                  | Huang et al. 2013  |
| <i>Oedaleus</i> | <i>infernalis</i>        | China | GBMIN15669-13 | KC140044 | 04.08.2007 | Wei Ye        | China                                  | Huang et al. 2013  |
| <i>Oedaleus</i> | <i>infernalis</i>        | Japan | GBMOR359-10   | AB497592 | 02.10.2006 |               | Japan, Honshu, Honshu,Ibaraki, Tsukuba | Tokuda et al. 2010 |
| <i>Oedaleus</i> | <i>manjius</i>           | China | GBMIN15666-13 | KC140050 | 18.09.2002 |               | China                                  | Huang et al. 2013  |

|                        |                     |         |               |          |            |                          |                                                                                  |                         |
|------------------------|---------------------|---------|---------------|----------|------------|--------------------------|----------------------------------------------------------------------------------|-------------------------|
| <i>Oedaleus</i>        | <i>manjius</i>      | China   | GBMIN15842-13 | KC140049 | 05.07.2006 | Jianhua Huang            | China                                                                            | Huang et al. 2013       |
| <i>Oedaleus</i>        | <i>senegalensis</i> | Algeria | OBAL026-18    | D526     | 20.05.2013 | AM                       | Algeria, Kantara                                                                 |                         |
| <i>Oedaleus</i>        | <i>senegalensis</i> | Algeria | OBAL027-18    | D533     | 11.05.2013 | AM                       | Algeria, Kantara                                                                 |                         |
| <b><i>Oedipoda</i></b> |                     |         |               |          |            |                          |                                                                                  |                         |
| <i>Oedipoda</i>        | <i>caerulescens</i> | Germany | FBORT056-9    | GU706078 | 02.08.1999 | A. Weis                  | Germany, Bavaria, Oberbayern, Neuaubing                                          | Hawlitcshek et al. 2017 |
| <i>Oedipoda</i>        | <i>caerulescens</i> | Germany | FBORT127-9    | GU706132 | 12.07.2009 | F. Glaw                  | Germany, Bavaria, Oberbayern, Garching                                           | Hawlitcshek et al. 2017 |
| <i>Oedipoda</i>        | <i>caerulescens</i> | Germany | FBORT128-9    | GU706134 | 12.07.2009 | F. Glaw                  | Germany, Bavaria, Oberbayern, Rangierbahnhof Muenchen Nord, suedexponierter Hang | Hawlitcshek et al. 2017 |
| <i>Oedipoda</i>        | <i>caerulescens</i> | Germany | FBORT141-9    | GU706135 | 22.07.2009 | F. Glaw & O. Hawlitcshek | Germany, Bavaria, Oberbayern, Garching Heide                                     | Hawlitcshek et al. 2017 |
| <i>Oedipoda</i>        | <i>caerulescens</i> | Germany | FBORT142-9    | GU706103 | 22.07.2009 | F. Glaw & O. Hawlitcshek | Germany, Bavaria, Oberbayern, Garching Heide                                     | Hawlitcshek et al. 2017 |
| <i>Oedipoda</i>        | <i>caerulescens</i> | Germany | FBORT144-9    | GU706104 | 22.07.2009 | F. Glaw & O. Hawlitcshek | Germany, Bavaria, Oberbayern, Garching Heide                                     | Hawlitcshek et al. 2017 |
| <i>Oedipoda</i>        | <i>caerulescens</i> | Germany | FBORT145-9    | GU706133 | 22.07.2009 | F. Glaw & O. Hawlitcshek | Germany, Bavaria, Oberbayern, S-Bahngelaende zwischen Laim und Pasing, Rohbodenf | Hawlitcshek et al. 2017 |
| <i>Oedipoda</i>        | <i>caerulescens</i> | Austria | FBORT345-10   | HM902104 | 05.09.2009 | F., K. & T. Glaw         | Austria, Tirol, Kala Alm bei Thiersee                                            | Hawlitcshek et al. 2017 |
| <i>Oedipoda</i>        | <i>caerulescens</i> | Russia  | GBMOR531-13   | HQ652508 |            |                          | Russia, Kaliningradsкая Oblast, Kaliningrad Region, Kurshskaja Kosa              | Vedenina & Mugue unpub. |



|                            |                    |            |              |          |            |                   |                                                                                  |                         |
|----------------------------|--------------------|------------|--------------|----------|------------|-------------------|----------------------------------------------------------------------------------|-------------------------|
| <i>Oedipoda</i>            | <i>fedtschenki</i> |            | GBMOR789-13  | KC261395 |            |                   |                                                                                  | Bugrov et al. unpub.    |
| <i>Oedipoda</i>            | <i>fuscocincta</i> | Spain      | GBMOR1369-15 | KM095635 |            |                   | Spain; Asturias                                                                  | Laiolo et al. 2014      |
| <i>Oedipoda</i>            | <i>miniata</i>     | Algeria    | OBAL028-18   | D531     | 11.05.2013 | AM                | Algeria, Kantara                                                                 |                         |
| <i>Oedipoda</i>            | <i>miniata</i>     | Algeria    | OBAL029-18   | D535     | 11.05.2013 | AM                | Algeria, Kantara                                                                 |                         |
| <i>Oedipoda</i>            | <i>miniata</i>     | Azerbaijan | OBAL030-18   | K618     | 10.10.2008 |                   | Aserbajdschan, Shirvan-Nationalpark                                              |                         |
| <i>Oedipoda</i>            | <i>miniata</i>     | Azerbaijan | OBAL031-18   | K626     | 30.09.2008 |                   | Aserbajdschan, Besh Baranq (90 km N Baku)                                        |                         |
| <i>Oedipoda</i>            | <i>schochi</i>     | Iran       | OBAL032-18   | Iran283  | 14.09.2014 | MH                | Iran, Karaj-chalus road, Kandvan tunnel                                          |                         |
| <b><i>Spec.</i></b>        |                    |            |              |          |            |                   |                                                                                  |                         |
| <i>Spec.</i>               | <i>1</i>           | Algeria    | OBAL033-18   | D592     | 10.08.2015 | AM                | Algeria, Biskra                                                                  |                         |
| <i>Spec.</i>               | <i>1</i>           | Algeria    | OBAL034-18   | D593     | 10.08.2015 | AM                | Algeria, Biskra                                                                  |                         |
| <i>Spec.</i>               | <i>1</i>           | Algeria    | OBAL035-18   | D594     | 10.08.2015 | AM                | Algeria, Biskra                                                                  |                         |
| <b><i>Sphingoderus</i></b> |                    |            |              |          |            |                   |                                                                                  |                         |
| <i>Sphingoderus</i>        | <i>carinatus</i>   | Algeria    | OBAL036-18   | D552     | 23.05.2008 | AM                | Algeria, Mekhadama                                                               |                         |
| <i>Sphingoderus</i>        | <i>carinatus</i>   | Algeria    | OBAL037-18   | D570     | 23.05.2008 | AM                | Algeria, Mekhadama                                                               |                         |
| <i>Sphingoderus</i>        | <i>carinatus</i>   | Tunisia    | OBAL038-18   | K473     |            |                   |                                                                                  |                         |
| <b><i>Sphingonotus</i></b> |                    |            |              |          |            |                   |                                                                                  |                         |
| <i>Sphingonotus</i>        | <i>azurescens</i>  | Spain      | OBAL039-18   | K405     | 30.09.2005 | AH                | Spain, La Plantonada, Sierra Nevada                                              |                         |
| <i>Sphingonotus</i>        | <i>azurescens</i>  | Portugal   | OBAL040-18   | K762     |            | AH                | Portugal                                                                         |                         |
| <i>Sphingonotus</i>        | <i>azurescens</i>  | Spain      | OBAL041-18   | K763     |            | D. Lluçia Pomares | IN-003-11                                                                        |                         |
| <i>Sphingonotus</i>        | <i>caerulans</i>   | Germany    | OBAL042-18   | D1       | 21.09.2013 | MH                | Germany, Frankfurt (Main)                                                        |                         |
| <i>Sphingonotus</i>        | <i>caerulans</i>   | Germany    | FBORT102-9   | GU706137 | 30.07.2009 | O. Hawlitschek    | Germany, Bavaria, Oberbayern, S-Bahngelaende zwischen Laim und Pasing, Rohbodenf | Hawlitschek et al. 2017 |

|                     |                    |         |               |               |            |                 |                                                                  |                         |
|---------------------|--------------------|---------|---------------|---------------|------------|-----------------|------------------------------------------------------------------|-------------------------|
| <i>Sphingonotus</i> | <i>caerulans</i>   | Germany | FBORT166-9    | GU706100      | 30.07.2009 | O. Hawlitschek  | Germany, Bavaria, Oberbayern, Garchinger Heide                   | Hawlitschek et al. 2017 |
| <i>Sphingonotus</i> | <i>caerulans</i>   | Germany | FBORT487-13   | N.a.          | 17.07.2012 | O. Hawlitschek  | Germany, Bavaria, Oberpfalz, Zinster-Basaltsteinbruch NE Kulmain | Hawlitschek et al. 2017 |
| <i>Sphingonotus</i> | <i>caerulans</i>   | Germany | FBORT499-13   | N.a.          | 17.07.2012 | O. Hawlitschek  | Germany, Bavaria, Oberpfalz, Zinster-Basaltsteinbruch NE Kulmain | Hawlitschek et al. 2017 |
| <i>Sphingonotus</i> | <i>caerulans</i>   | France  | GBMIN21328-13 | K315/JQ513068 |            |                 |                                                                  | Husemann et al. 2010    |
| <i>Sphingonotus</i> | <i>caerulans</i>   | Finland | GBMIN21351-13 | K608/JQ513067 |            |                 |                                                                  | Husemann et al. 2011    |
| <i>Sphingonotus</i> | <i>caerulans</i>   | Italy   | GBMOR1746-15  | K613/KJ923335 |            |                 | Italy, Affi                                                      | Husemann et al. 2012    |
| <i>Sphingonotus</i> | <i>caerulans</i>   | Norway  | NOORT036-12   | N.a.          | 28.07.2002 | Ove Lonnve      | Norway, Ostfold, Fredrikstad, Slevik                             |                         |
| <i>Sphingonotus</i> | <i>caerulans</i>   | Norway  | NOORT039-12   | N.a.          | 20.08.2004 | Ove Sorlibraten | Norway, Ostfold, Hvaler, Asmaloy, Huser                          |                         |
| <i>Sphingonotus</i> | <i>caerulans</i>   | Norway  | NOORT042-12   | N.a.          | 31.08.2000 | Lars Ove Hansen | Norway, Vestfold, Tonsberg, Undrum, Flatasen                     |                         |
| <i>Sphingonotus</i> | <i>caerulans</i>   | Norway  | NOORT174-13   | N.a.          | 28.07.2002 | Ole Lonnve      | Norway, Ostfold, Fredrikstad, Selvik                             |                         |
| <i>Sphingonotus</i> | <i>caerulans</i>   | Norway  | NOORT175-13   | N.a.          | 28.07.2002 | Ole Lonnve      | Norway, Ostfold, Fredrikstad, Selvik                             |                         |
| <i>Sphingonotus</i> | <i>canariensis</i> | Sokotra | OBAL043-18    | K731          |            | R. Felix        | Jemen, Sokotra, Wadi Shilliyin, Momi                             |                         |
| <i>Sphingonotus</i> | <i>canariensis</i> | Sokotra | OBAL044-18    | K732          |            | R. Felix        | Jemen, Sokotra, Wadi Shilliyin, Momi                             |                         |
| <i>Sphingonotus</i> | <i>ebneri</i>      | Algeria | OBAL045-18    | D589          | 06.06.2010 | AM              | Algeria, Bir Naam                                                |                         |
| <i>Sphingonotus</i> | <i>finotianus</i>  | Algeria | OBAL046-18    | D596          | 06.08.2015 | AM              | Algeria, Kantara                                                 |                         |
| <i>Sphingonotus</i> | <i>finotianus</i>  | Algeria | OBAL047-18    | D597          | 06.08.2015 | AM              | Algeria, Kantara                                                 |                         |

|                     |                       |                    |               |               |            |            |  |                                                        |                      |
|---------------------|-----------------------|--------------------|---------------|---------------|------------|------------|--|--------------------------------------------------------|----------------------|
| <i>Sphingonotus</i> | <i>finotianus</i>     | Tunisia            | GBMIN21348-13 | K383/JQ513073 |            |            |  |                                                        | Husemann et al. 2012 |
| <i>Sphingonotus</i> | <i>haitensis</i>      | Dominican Republic | GBMOR1764-15  | K423/KJ923353 |            |            |  | Dominican Republic, Santiago, Prov. Santiago           | Husemann et al. 2012 |
| <i>Sphingonotus</i> | <i>haitensis</i>      | Dominican Republic | GBMOR1765-15  | T179/KJ923354 |            |            |  | Dominican Republic, Independencia, Prov. Independencia | Husemann et al. 2012 |
| <i>Sphingonotus</i> | <i>haitensis</i>      | Dominican Republic | GBMOR1766-15  | T180/KJ923355 |            |            |  | Dominican Republic, Prov. San Christobal               | Husemann et al. 2012 |
| <i>Sphingonotus</i> | <i>haitensis</i>      | Dominican Republic | GBMOR1767-15  | T39/KJ923356  |            |            |  | Dominican Republic, Peravia, Prov. Peravia             | Husemann et al. 2012 |
| <i>Sphingonotus</i> | <i>haitensis</i>      | Dominican Republic | GBMOR1768-15  | T40/KJ923357  |            |            |  | Dominican Republic, Pedernales, Prov. Pedernales       | Husemann et al. 2012 |
| <i>Sphingonotus</i> | <i>haitensis</i>      | Dominican Republic | GBMOR1769-15  | T41/KJ923358  |            |            |  | Dominican Republic, Pedernales, Prov. Pedernales       | Husemann et al. 2012 |
| <i>Sphingonotus</i> | <i>lluciapomaresi</i> | Spain              | OBAL048-18    | K332          | 01.10.2005 | AH         |  | Spain, Salinas del Cabo de Gata                        |                      |
| <i>Sphingonotus</i> | <i>longipennis</i>    | Pakistan           | MAORT581-11   | KJ672155      | 24.09.2008 | A. Tamkeen |  | Pakistan, AJK, Bhan Gali                               | Nazir et al. unpub.  |
| <i>Sphingonotus</i> | <i>longipennis</i>    | Pakistan           | MAORT582-11   | KJ672156      | 19.09.2009 | A. Tamkeen |  | Pakistan, AJK, Degawar                                 | Nazir et al. unpub.  |
| <i>Sphingonotus</i> | <i>longipennis</i>    | Pakistan           | MAORT584-11   | KJ672153      | 19.09.2009 | A. Tamkeen |  | Pakistan, AJK, Degawar                                 | Nazir et al. unpub.  |
| <i>Sphingonotus</i> | <i>longipennis</i>    | Pakistan           | MAORT585-11   | KJ672154      | 04.09.2010 | A. Tamkeen |  | Pakistan, AJK, Degawar                                 | Nazir et al. unpub.  |
| <i>Sphingonotus</i> | <i>lucasii</i>        | Algeria            | OBAL049-18    | D587          | 20.07.2009 | AM         |  | Algeria, Chelia                                        |                      |
| <i>Sphingonotus</i> | <i>lucasii</i>        | Algeria            | OBAL050-18    | D588          | 20.07.2009 | AM         |  | Algeria, Chelia                                        |                      |
| <i>Sphingonotus</i> | <i>lucasii</i>        | Tunisia            | OBAL051-18    | K472          | 25.07.2006 | AH         |  | Tunisia, Hergla                                        |                      |
| <i>Sphingonotus</i> | <i>lucasii</i>        | Morocco            | OBAL052-18    | K522          | 14.09.2007 | AH         |  | Morocco, Tizoula                                       |                      |
| <i>Sphingonotus</i> | <i>lucasii</i>        | Morocco            | OBAL053-18    | K525          | 14.09.2007 | AH         |  | Morocco, Tizoula                                       |                      |
| <i>Sphingonotus</i> | <i>luteus</i>         | Morocco            | OBAL054-18    | K526          | 14.09.2007 | AH         |  | Morocco, Tizoula                                       |                      |
| <i>Sphingonotus</i> | <i>luteus</i>         | Morocco            | OBAL055-18    | K527          | 14.09.2007 | AH         |  | Morocco, Tizoula                                       |                      |
| <i>Sphingonotus</i> | <i>maroccanus</i>     | Morocco            | OBAL056-18    | K651          | 12.03.2009 | MH         |  | Morocco, Ameskrout                                     |                      |

|                          |                            |                |               |               |            |             |                                               |                                              |
|--------------------------|----------------------------|----------------|---------------|---------------|------------|-------------|-----------------------------------------------|----------------------------------------------|
| <i>Sphingonotus</i>      | <i>octofasciatus</i>       | Algeria        | OBAL057-18    | D516          | 11.05.2013 | AM          | Algeria, Kantara                              | Husemann et al. 2012<br>Husemann et al. 2012 |
| <i>Sphingonotus</i>      | <i>octofasciatus</i>       | Algeria        | OBAL058-18    | D524          | 11.05.2013 | AM          | Algeria, Kantara                              |                                              |
| <i>Sphingonotus</i>      | <i>octofasciatus</i>       | Tunisia        | OBAL059-18    | K470          | 24.07.2006 | AH          | Tunisia, Gafsa                                |                                              |
| <i>Sphingonotus</i>      | <i>radioserratus</i>       | Algeria        | OBAL060-18    | D558          | 26.09.2009 | AM          | Algeria, Mekhadama                            |                                              |
| <i>Sphingonotus</i>      | <i>radioserratus</i>       | Algeria        | OBAL061-18    | D559          | 26.09.2009 | AM          | Algeria, Mekhadama                            |                                              |
| <i>Sphingonotus</i>      | <i>rubescens</i>           | Gran Canary    | OBAL062-18    | D303          |            | AH          | Spain, Gran Canaria, Aguele                   |                                              |
| <i>Sphingonotus</i>      | <i>rubescens</i>           | Algeria        | OBAL063-18    | D519          | 11.05.2013 | AM          | Algeria, Kantara                              |                                              |
| <i>Sphingonotus</i>      | <i>rubescens</i>           | Algeria        | OBAL064-18    | D521          | 11.05.2013 | AM          | Algeria, Kantara                              |                                              |
| <i>Sphingonotus</i>      | <i>rubescens</i>           | Algeria        | OBAL065-18    | D573          | 30.04.2009 | AM          | Algeria, Foghala                              |                                              |
| <i>Sphingonotus</i>      | <i>rubescens</i>           | Algeria        | OBAL066-18    | D574          | 04.04.2009 | AM          | Algeria, Biskra                               |                                              |
| <i>Sphingonotus</i>      | <i>rubescens</i>           | Cap Verde      | GBMIN21327-13 | K510/JQ513070 |            |             |                                               |                                              |
| <i>Sphingonotus</i>      | <i>rubescens</i>           | Canary Islands | GBMIN21350-13 | K351/JQ513069 |            |             |                                               |                                              |
| <i>Sphingonotus</i>      | <i>rubescens burri</i>     | Cape Verde     | OBAL067-18    | K497          | 14.01.2003 | F. Buzzetti | Kapverden, Sal Boracona                       |                                              |
| <i>Sphingonotus</i>      | <i>rubescens fasciatus</i> | Kirgistan      | OBAL068-18    | K748          | 18.07.2005 | D. Milko    | Kirgisias., Sokh Ravine, near Ak-Turpak vill. |                                              |
| <i>Sphingonotus</i>      | <i>savignyi</i>            | Algeria        | OBAL069-18    | D518          | 19.05.2012 | AM          | Algeria, Bir Naam                             |                                              |
| <i>Sphingonotus</i>      | <i>savignyi</i>            | Kenya          | OBAL070-18    | D77           | 2013       | C. Hemp     | Kenya, Lake Turkana                           |                                              |
| <i>Sphingonotus</i>      | <i>savignyi</i>            | Kenya          | OBAL071-18    | D79           | 2013       | C. Hemp     | Kenya, Lake Turkana                           |                                              |
| <i>Sphingonotus</i>      | <i>savignyi</i>            | Kenya          | OBAL072-18    | D80           | 2013       | C. Hemp     | Kenya, Lake Turkana                           |                                              |
| <i>Sphingonotus</i>      | <i>savignyi</i>            | La Gomera      | OBAL073-18    | K145          | 05.04.2004 | AH          | Spain, La Gomera, Aeropuerto                  |                                              |
| <i>Sphingonotus</i>      | <i>savignyi</i>            | Tunisia        | OBAL074-18    | K541          | 02.08.2007 | AH          | Tunisia, Djebel el Ali bei Gafsa              |                                              |
| <i>Sphingonotus</i>      | <i>savignyi</i>            | Azerbaidshon   | OBAL075-18    | K621          | 30.09.2008 |             | Azerbaidshon, Besh Baranq (90 km N Baku)      |                                              |
| <i>Sphingonotus</i>      | <i>tricinctus</i>          | Algeria        | OBAL076-18    | D581          | 04.07.2011 | AM          | Algeria, Bir Naam                             |                                              |
| <b><i>Thalpomena</i></b> |                            |                |               |               |            |             |                                               |                                              |
| <i>Thalpomena</i>        | <i>algeriana</i>           | Algeria        | OBAL077-18    | D563          | 09.07.2009 | AM          | Algeria, Chelia                               |                                              |
| <i>Thalpomena</i>        | <i>algeriana</i>           | Algeria        | OBAL078-18    | D564          | 09.07.2009 | AM          | Algeria, Chelia                               |                                              |

|                            |                          |              |               |               |            |                |                                 |
|----------------------------|--------------------------|--------------|---------------|---------------|------------|----------------|---------------------------------|
| <i>Thalpomena</i>          | <i>coeruleipennis</i>    | Morocco      | OBAL079-18    | D113          | 16.02.2014 | MH             | Morocco, nahe Skhour Rhamna     |
| <i>Thalpomena</i>          | <i>coeruleipennis</i>    | Morocco      | OBAL080-18    | D115          | 16.02.2014 | MH             | Morocco, nahe Skhour Rhamna     |
| <i>Thalpomena</i>          | <i>coerulescens</i>      | Algeria      | OBAL081-18    | D599          | 06.08.2015 | AM             | Algeria, Kantara, Biskra        |
| <i>Thalpomena</i>          | <i>coerulescens</i>      | Algeria      | OBAL082-18    | D600          | 06.08.2015 | AM             | Algeria, Kantara, Biskra        |
| <i>Thalpomena</i>          | <i>coerulescens</i>      | Morocco      | OBAL083-18    | K227          | 10.03.2005 | AH             | Morocco, Irhil-n'-Isemsiden     |
| <i>Thalpomena</i>          | <i>viridipennis</i>      | Morocco      | OBAL084-18    | D152          | 15.02.2014 | MH             | Morocco, 5 km S Ksar el Kebir   |
| <i>Thalpomena</i>          | <i>viridipennis</i>      | Morocco      | OBAL085-18    | D161          | 14.02.2014 | MH             | Morocco, Cap Mazari             |
| <i>Thalpomena</i>          | <i>viridipennis</i>      | Morocco      | GBMIN21334-13 | K641/JQ513056 |            |                |                                 |
| <b><i>Vosseleriana</i></b> |                          |              |               |               |            |                |                                 |
| <i>Vosseleriana</i>        | <i>arabica</i>           | Saudi Arabia | OBAL086-18    | D821          | 28.06.1992 | M. Donskoff    | Saudi Arabia, Route Taif - Abha |
| <i>Vosseleriana</i>        | <i>arabica galagheri</i> | Oman         | OBAL087-18    | K564          | 11.06.1905 | M.D. Gallagher | Oman                            |
| <i>Vosseleriana</i>        | <i>arabica galagheri</i> | Oman         | OBAL088-18    | K579          |            |                |                                 |
| <i>Vosseleriana</i>        | <i>fonti</i>             | Algeria      | OBAL089-18    | D560          | 06.04.2013 | AM             | Algeria, Chaiba                 |
| <i>Vosseleriana</i>        | <i>fonti</i>             | Algeria      | OBAL090-18    | D566          | 06.04.2013 | AM             | Algeria, Chaiba                 |
| <i>Vosseleriana</i>        | <i>fonti</i>             | Algeria      | OBAL091-18    | D567          | 19.04.2013 | AM             | Algeria, Chaiba                 |

Husemann et al. 2012

## References

- Bugrov A., Smyshlyaev G. and Blinov A. unpublished. Phylogeny of grasshoppers (Orthoptera, Acrididae) based on the analysis of DNA sequences in COI mitochondrial gene. Unpublished.
- Hawltischek O., Morinière J, Lehmann GUC, Lehmann AW, Kropf M, Dunz A, Glaw F, Detcharoen M, Schmidt S, Hausmann A, Szucsich NU, Caetano-Wyler SA, Hazprunar G. 2016. DNA barcoding of crickets, katydids and grasshoppers (Orthoptera) from Central Europe with focus on Austria, Germany and Switzerland. *Mol Ecol Res* 117: 1037-1053.
- Huang, J., Zhang, A., Mao, S., & Huang, Y. 2013. DNA barcoding and species boundary delimitation of selected species of Chinese Acridoidea (Orthoptera: Caelifera). *PloS One* 8: e82400.
- Laiolo P., Illera J. C., Meléndez L., Segura A., & Obeso J. R. 2014. Abiotic, biotic, and evolutionary control of the distribution of C and N isotopes in food webs. *Am Nat* 185: 169-182.
- Nazir, N., Mehmood, K., Ashfaq, M. and Rahim, J. unpublished. Morphological and molecular identification of Acridid grasshoppers (Acrididae: Orthoptera) from Poonch division, Azad Jammu Kashmir, Pakistan. Unpublished.
- Tokuda, M., Tanaka, S., & Zhu, D. H. 2010. Multiple origins of *Locusta migratoria* (Orthoptera: Acrididae) in the Japanese Archipelago and the presence of two major clades in the world: evidence from a molecular approach. *Biol J Linn Soc* 99: 570-581.
- Vedenina, V., & Mugue, N. 2011. Speciation in gomphocerine grasshoppers: molecular phylogeny versus bioacoustics and courtship behavior. *J Orthop Res* 20: 109-125.
